# Supplementary material for: Ultrasmall targeted nanoparticles with engineered antibody fragments for imaging detection of HER2-overexpressing breast cancer
Source: PubMed Central journal article supplement (PMC6175906; doi:10.1038/s41467-018-06271-5), 2018-10-08
Supplement: 41467_2018_6271_MOESM2_ESM.pdf [file 41467_2018_6271_MOESM2_ESM.pdf]

**Editorial Note:** this manuscript has been previously reviewed at another journal that is not operating a transparent peer review scheme.
